# Supplementary material for: InPZnS alloy quantum dots with tris(hexylthio)phosphine as a dual anionic precursor
Source: Royal Society of Chemistry journal article supplement (doi:10.1039/c7nr08211h), 2018-01-01
Supplement: c7nr08211h1.pdf [file c7nr08211h1.pdf]

## Supporting Information

### **InPZnS alloy quantum dot with tris(hexylthio)phosphine as a dual anionic precursor**

Soyeon An, Hyelim Cho, Heungbae Jeon\* and Sang-Wook Kim\*

Department of Molecular Science and Technology, Ajou University, Suwon 443-749, Korea.

Department of chemistry, Kwangwoon University, Seoul, 130-701, Korea

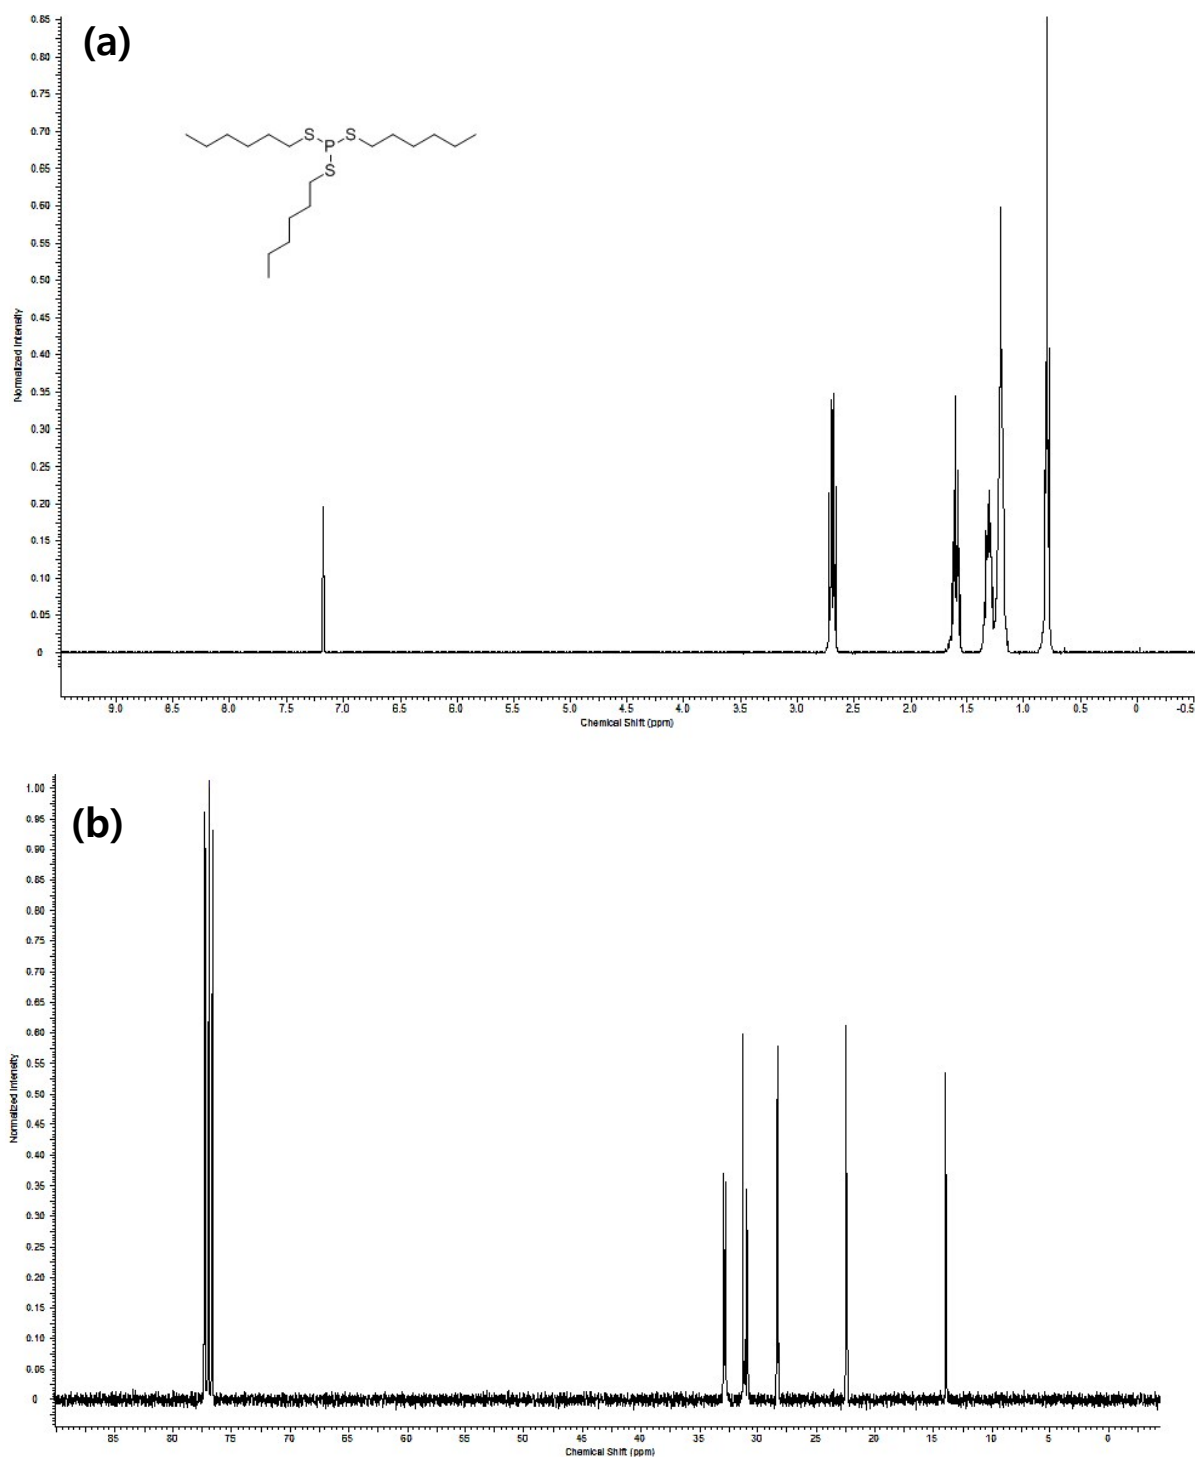

Figure S1. (a)  $^1\text{H}$  NMR of tris(hexylthio)phosphine  
(b)  $^{13}\text{C}$  NMR of tris(hexylthio)phosphine

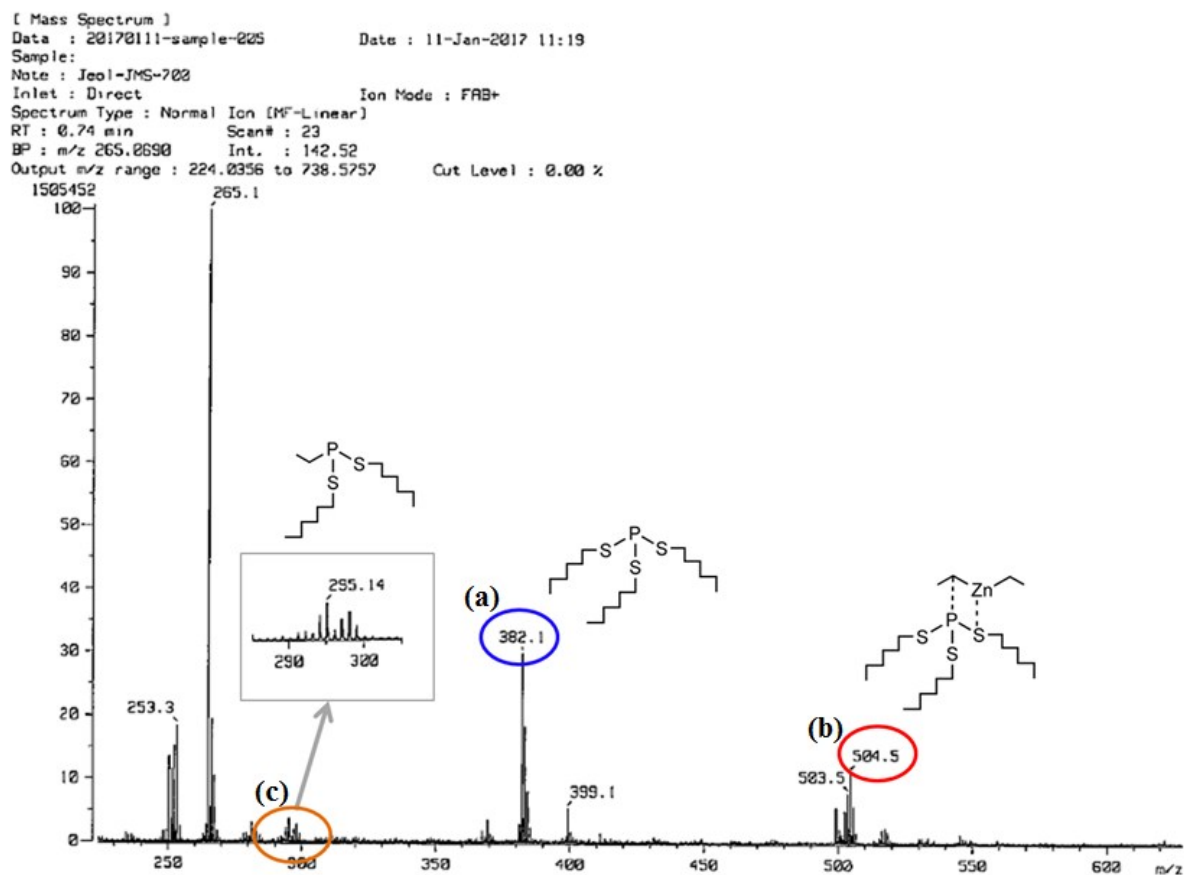

**Figure S2.** The FAB-Mass

(a) tris(hexylthio)phosphine.

(b) tris(hexylthio)phosphine(THTP) and diethylzinc complex.

(c) ethyldihexylthiophosphine.

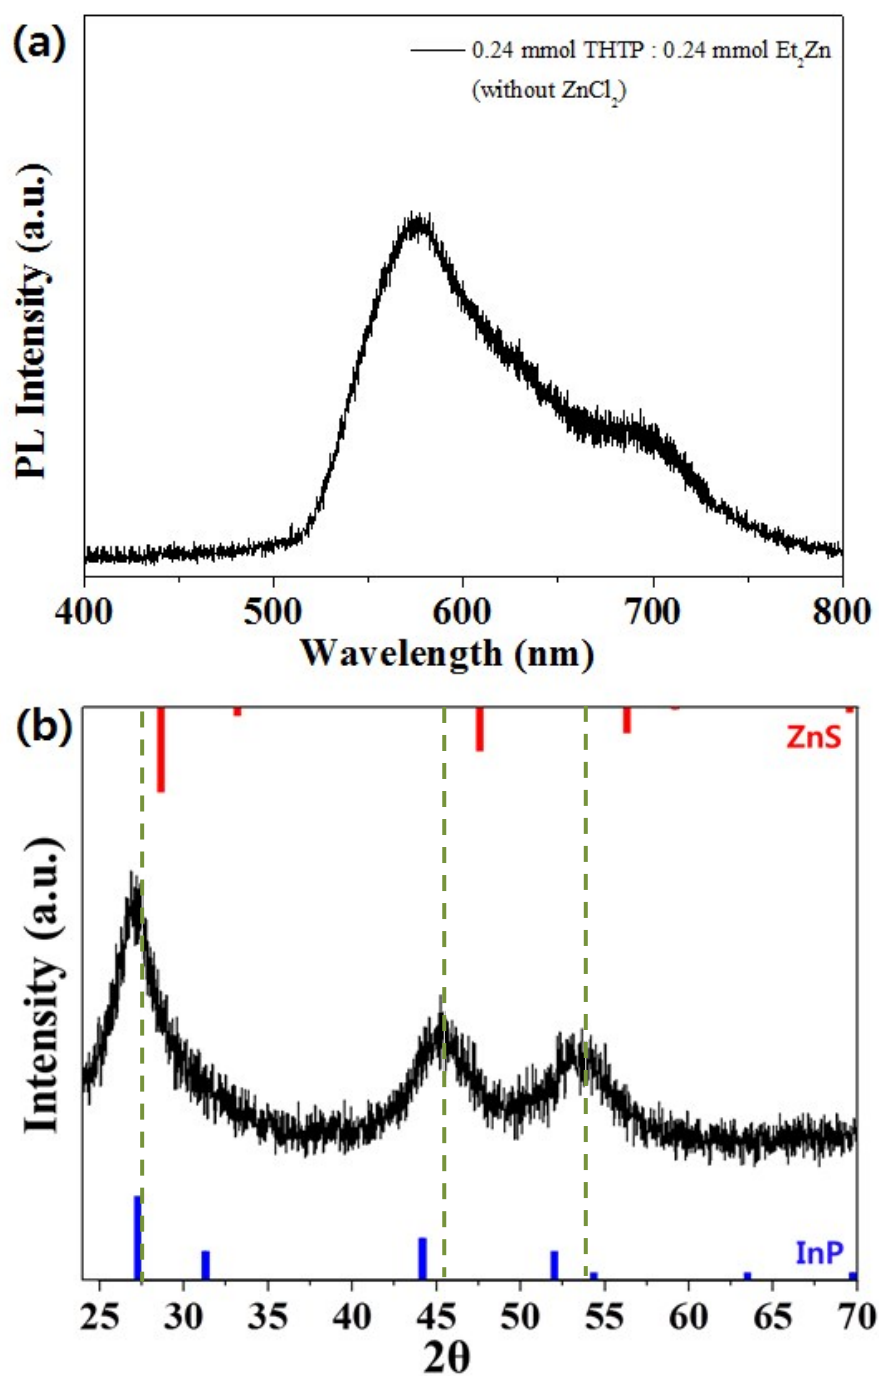

**Figure S3.** (a) photoluminescence spectra of InPZnS alloy core ( $\lambda=570$  nm). (b) XRD diagram of InPZnS alloy core (THTP, Et<sub>2</sub>Zn used 0.24 mmol without ZnCl<sub>2</sub>)

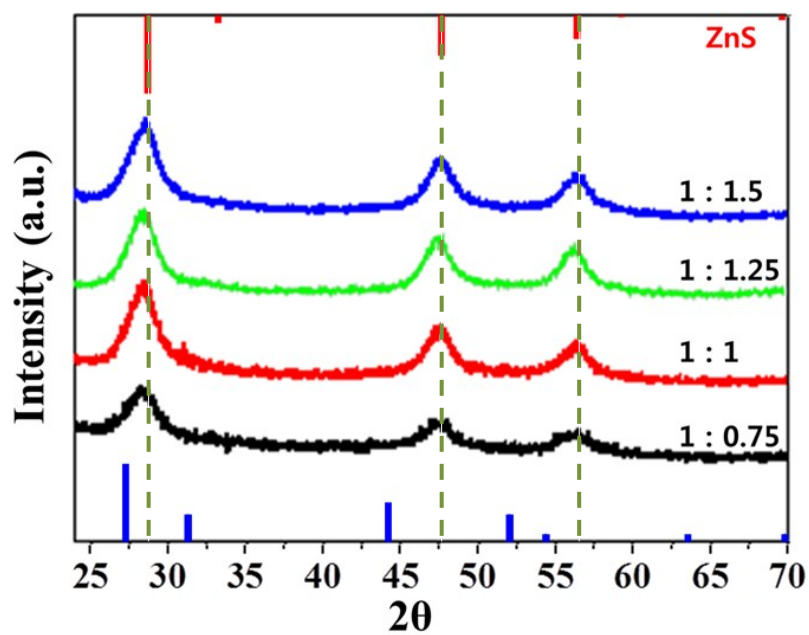

**Figure S4.** XRD diagram of THTP/Et<sub>2</sub>Zn ratio.

As the diethylzinc amount increases, the XRD peak shifts toward ZnS.

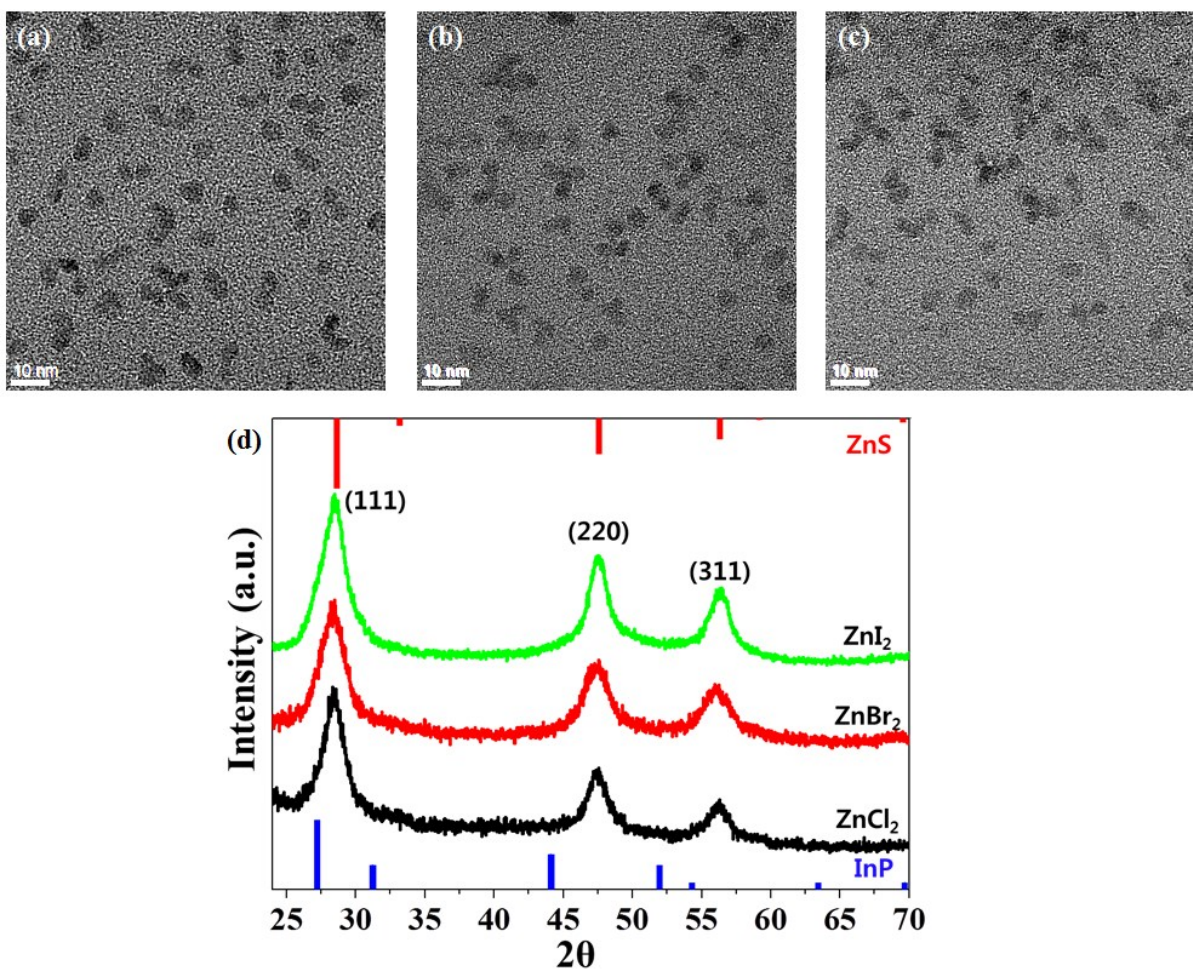

**Figure S5.** TEM images of InPZnS alloy core using different zinc precursor (a) ZnCl<sub>2</sub> (b) ZnBr<sub>2</sub> (C) ZnI<sub>2</sub>. (d) XRD diagram using different zinc precursor.

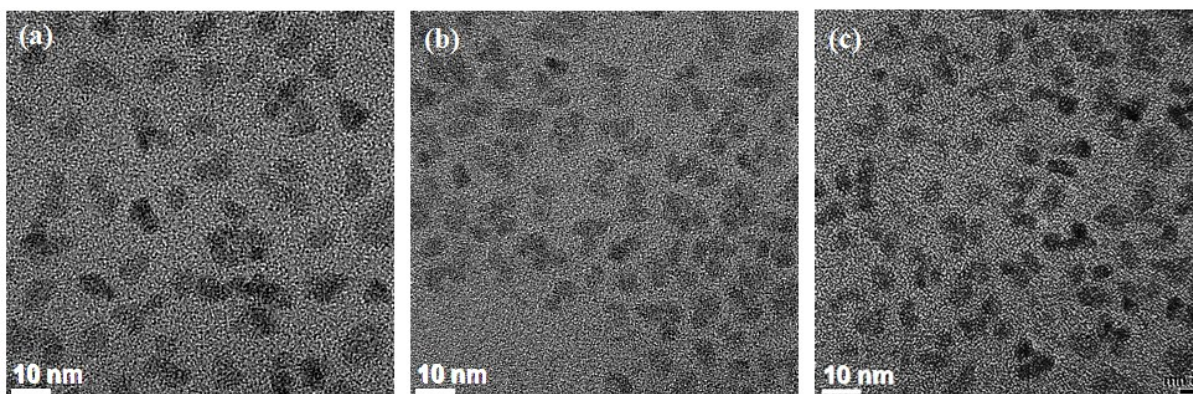

**Figure S6.** TEM images of InPZnS/ZnS using different zinc precursors (a) ZnCl<sub>2</sub> (b) ZnBr<sub>2</sub> (c) ZnI<sub>2</sub>.
